# Supplementary material
Source: PubMed Central journal article supplement (PMC4184454)
Supplement: pr500503q_si_001.pdf [file pr500503q_si_001.pdf]

## SUPPORTING INFORMATION

### Global analysis of human non-receptor tyrosine kinase specificity using high-density peptide microarrays

Yang Deng, Nilda L. Alicea-Velázquez, Ludovic Bannwarth, Soili I. Lehtonen, Titus J. Boggon, Heung-Chin Cheng, Vesa P. Hytönen, and Benjamin E. Turk

**Supplementary Dataset 1. Quantified microarray data for all kinases analyzed.** Spot intensities were quantified from phosphor imager scans of microarray slides using QuantityOne software (BioRad). Data were normalized so that the average value of all amino acids within a single position was assigned a value of 1. Normalized data for two separate microarray runs were averaged.

**Table S1. Expression systems used to generate kinases for microarray analysis.** Kinases produced in HEK293T cells were expressed as N-terminal GST fusion proteins and purified by glutathione affinity chromatography as described in the main text. Kinases produced in insect cells or bacteria were expressed as hexahistidine-tagged proteins and purified by immobilized metal affinity chromatography. Where indicated, kinases were activated by treating transfected HEK293T cells with the general tyrosine phosphatase inhibitor pervanadate prior to lysis.

| Kinase | Expression system | Notes                      |
|--------|-------------------|----------------------------|
| ABL    | Insect cells      |                            |
| ACK    | HEK293T cells     |                            |
| ARG    | HEK293T cells     |                            |
| BLK    | HEK293T cells     |                            |
| BMX    | HEK293T cells     | Activated with pervanadate |
| BRK    | HEK293T cells     | Activated with pervanadate |
| BTK    | HEK293T cells     |                            |
| CSK    | Insect cells      |                            |
| FER    | HEK293T cells     |                            |
| FES    | Bacteria          |                            |
| FGR    | HEK293T cells     |                            |
| FRK    | HEK293T cells     |                            |
| FYN    | HEK293T cells     |                            |
| HCK    | HEK293T cells     |                            |
| JAK1   | Insect cells      |                            |
| JAK2   | Insect cells      | Commercial source          |
| JAK3   | Insect cells      |                            |
| LCK    | Insect cells      | Commercial source          |
| LYN    | HEK293T cells     |                            |
| PYK2   | HEK293T cells     |                            |
| SRC    | HEK293T cells     |                            |
| SRM    | HEK293T cells     |                            |
| SYK    | HEK293T cells     |                            |
| TEC    | HEK293T cells     | Activated with pervanadate |
| TXK    | Insect cells      | Commercial source          |
| YES    | HEK293T cells     |                            |
